# Supplementary material for: BioDataome: a collection of uniformly preprocessed and automatically annotated datasets for data-driven biology
Source: Oxford University Press journal article supplement (doi:10.1093/database/bay011), 2018-01-01
Supplement: bay011_supp_table1.pdf [file bay011_supp_table1.pdf]

Table 1: Disease annotation as provided by CREEDS and BioDataome. Match equals to 1 when the two annotations agree. Comments and links justify a match when both terms are correct. Overall, in 82% ( $\pm 6\%$ ) BioDatome's disease annotation matches crowdsourced annotation as provided in CREEDS.

| GSE      | creeds                                     | biodataome                             | Matches | Comments                                                                                                                                                   | Link                                                                                                                                  |
|----------|--------------------------------------------|----------------------------------------|---------|------------------------------------------------------------------------------------------------------------------------------------------------------------|---------------------------------------------------------------------------------------------------------------------------------------|
| GSE10325 | systemic lupus erythematosus               | systemic lupus erythematosus           | 1       |                                                                                                                                                            |                                                                                                                                       |
| GSE10575 | arthropathy                                | osteoarthritis                         | 1       | Migratory chondrogenic progenitor cells from repair tissue during the later stages of human osteoarthritis                                                 | <a href="https://www.ncbi.nlm.nih.gov/geo/query/acc.cgi?acc=GSE10575">https://www.ncbi.nlm.nih.gov/geo/query/acc.cgi?acc=GSE10575</a> |
| GSE10631 | LGLL - Large granular lymphocytic leukemia | leukemia                               |         |                                                                                                                                                            |                                                                                                                                       |
| GSE10946 | polycystic ovary syndrome                  | polycystic ovary syndrome              | 1       |                                                                                                                                                            |                                                                                                                                       |
| GSE10971 | serous cystadenocarcinoma                  | ovarian cancer                         | 1       | Serous cystadenocarcinoma is a type of tumor in the cystadenocarcinoma grouping. Most commonly the primary site of serous cystadenocarcinoma is the ovary. | <a href="https://en.wikipedia.org/wiki/Serous_cystadenocarcinoma">https://en.wikipedia.org/wiki/Serous_cystadenocarcinoma</a>         |
| GSE11348 | Rhinovirus infection                       | viral infectious disease               | 1       | The rhinovirus is the most common viral infectious agent in humans                                                                                         | <a href="https://en.wikipedia.org/wiki/Rhinovirus">https://en.wikipedia.org/wiki/Rhinovirus</a>                                       |
| GSE11524 | sickle cell anemia                         | sickle cell anemia                     | 1       |                                                                                                                                                            |                                                                                                                                       |
| GSE11886 | ankylosing spondylitis                     | ankylosing spondylitis                 | 1       |                                                                                                                                                            |                                                                                                                                       |
| GSE12452 | nasopharynx carcinoma                      | spindle cell carcinoma                 |         |                                                                                                                                                            |                                                                                                                                       |
| GSE12649 | Schizophrenia                              | bipolar disorder                       | 1       | Accumulating evidence suggests that mitochondrial dysfunction underlies the pathophysiology of bipolar disorder (BD) and schizophrenia (SZ)                | <a href="https://www.ncbi.nlm.nih.gov/geo/query/acc.cgi?acc=GSE12649">https://www.ncbi.nlm.nih.gov/geo/query/acc.cgi?acc=GSE12649</a> |
| GSE12679 | bipolar disorder                           | schizophrenia                          | 1       | Brain tissue from patients with schizophrenia and bipolar disorder and healthy controls                                                                    | <a href="https://www.ncbi.nlm.nih.gov/geo/query/acc.cgi?acc=GSE12679">https://www.ncbi.nlm.nih.gov/geo/query/acc.cgi?acc=GSE12679</a> |
| GSE13355 | Psoriasis vulgaris                         | psoriasis                              | 1       | Psoriasis vulgaris, makes up about 90 percent of psoriasis cases                                                                                           | <a href="https://en.wikipedia.org/wiki/Psoriasis">https://en.wikipedia.org/wiki/Psoriasis</a>                                         |
| GSE13887 | systemic lupus erythematosus               | systemic lupus erythematosus           | 1       |                                                                                                                                                            |                                                                                                                                       |
| GSE14407 | ovarian cancer                             | ovarian cancer                         | 1       |                                                                                                                                                            |                                                                                                                                       |
| GSE14905 | psoriasis                                  | psoriasis                              | 1       |                                                                                                                                                            |                                                                                                                                       |
| GSE15090 | facioscapulohumeral muscular dystrophy     | facioscapulohumeral muscular dystrophy | 1       |                                                                                                                                                            |                                                                                                                                       |
| GSE15471 | pancreatic ductal adenocarcinoma           | pancreatic ductal adenocarcinoma       | 1       |                                                                                                                                                            |                                                                                                                                       |

|          |                                                              |                                  |   |                                                                                                                                                     |                                                                                                                                                           |
|----------|--------------------------------------------------------------|----------------------------------|---|-----------------------------------------------------------------------------------------------------------------------------------------------------|-----------------------------------------------------------------------------------------------------------------------------------------------------------|
| GSE15824 | oligodendroglioma                                            | glioblastoma multiforme          | 1 | Glioblastoma multiforme is a malignant glioma and the most aggressive and most common primary brain tumor.<br>Oligodendroglioma is a type of glioma |                                                                                                                                                           |
| GSE16032 | asthma                                                       | asthma                           | 1 |                                                                                                                                                     |                                                                                                                                                           |
| GSE16461 | relapsing-remitting multiple sclerosis                       | rheumatoid arthritis             |   |                                                                                                                                                     |                                                                                                                                                           |
| GSE16464 | osteoarthritis                                               | osteoarthritis                   | 1 |                                                                                                                                                     |                                                                                                                                                           |
| GSE16515 | pancreatic cancer                                            | pancreatic cancer                | 1 |                                                                                                                                                     |                                                                                                                                                           |
| GSE16538 | pulmonary sarcoidosis                                        | pulmonary sarcoidosis            | 1 |                                                                                                                                                     |                                                                                                                                                           |
| GSE16715 | Williams-Beuren syndrome                                     | williams-beuren syndrome         | 1 |                                                                                                                                                     |                                                                                                                                                           |
| GSE16728 | sickle cell anemia                                           | sickle cell anemia               | 1 |                                                                                                                                                     |                                                                                                                                                           |
| GSE17612 | schizophrenia                                                | schizophrenia                    | 1 |                                                                                                                                                     |                                                                                                                                                           |
| GSE18632 | amyotrophic lateral sclerosis type 10                        | frontotemporal dementia          | 1 | Inclusions of TDP-43 are hallmarks of frontotemporal dementias and amyotrophic lateral sclerosis                                                    | <a href="https://www.ncbi.nlm.nih.gov/geo/query/acc.cgi?acc=GSE18632">https://www.ncbi.nlm.nih.gov/geo/query/acc.cgi?acc=GSE18632</a>                     |
| GSE18670 | pancreatic cancer                                            | pancreatic ductal adenocarcinoma | 1 | Pancreatic ductal adenocarcinoma (PDAC) is the most common malignancy of the pancreas.                                                              | <a href="https://www.pancreapedia.org/reviews/pancreatic-ductal-adenocarcinoma">https://www.pancreapedia.org/reviews/pancreatic-ductal-adenocarcinoma</a> |
| GSE19650 | pancreatic invasive intraductal papillary-mucinous carcinoma | pancreatic cancer                | 1 | Intraductal papillary-mucinous neoplasm (IPMN) of the pancreas is a precursor lesion of pancreatic cancer.                                          | <a href="https://www.ncbi.nlm.nih.gov/geo/query/acc.cgi?acc=GSE19650">https://www.ncbi.nlm.nih.gov/geo/query/acc.cgi?acc=GSE19650</a>                     |
| GSE20948 | hepatitis C                                                  | spindle cell carcinoma           |   |                                                                                                                                                     |                                                                                                                                                           |
| GSE21369 | idiopathic interstitial pneumonia                            | idiopathic pulmonary fibrosis    | 1 | idiopathic pulmonary fibrosis is a subtype of idiopathic interstitial pneumonia                                                                     | <a href="https://www.ncbi.nlm.nih.gov/geo/query/acc.cgi?acc=GSE21369">https://www.ncbi.nlm.nih.gov/geo/query/acc.cgi?acc=GSE21369</a>                     |
| GSE21422 | invasive ductal carcinoma                                    | ductal carcinoma in situ         | 1 |                                                                                                                                                     |                                                                                                                                                           |
| GSE21942 | multiple sclerosis                                           | multiple sclerosis               | 1 |                                                                                                                                                     |                                                                                                                                                           |
| GSE22619 | ulcerative colitis                                           | ulcerative colitis               | 1 |                                                                                                                                                     |                                                                                                                                                           |
| GSE23952 | pancreatic cancer                                            | pancreatic cancer                | 1 |                                                                                                                                                     |                                                                                                                                                           |
| GSE24206 | idiopathic pulmonary fibrosis                                | idiopathic pulmonary fibrosis    | 1 |                                                                                                                                                     |                                                                                                                                                           |
| GSE24514 | colorectal adenocarcinoma                                    | spindle cell carcinoma           |   |                                                                                                                                                     |                                                                                                                                                           |
| GSE26299 | glaucoma                                                     | glaucoma                         | 1 |                                                                                                                                                     |                                                                                                                                                           |
| GSE26910 | breast cancer                                                | cancer                           |   |                                                                                                                                                     |                                                                                                                                                           |
| GSE26969 | intracranial aneurysm                                        | Bowman's membrane folds or       |   |                                                                                                                                                     |                                                                                                                                                           |
| GSE27011 | asthma                                                       | asthma                           | 1 |                                                                                                                                                     |                                                                                                                                                           |
| GSE28619 | alcoholic hepatitis                                          | alcoholic hepatitis              | 1 |                                                                                                                                                     |                                                                                                                                                           |

|          |                                             |                                        |   |                                                                                                                                           |                                                                                                                                                                               |
|----------|---------------------------------------------|----------------------------------------|---|-------------------------------------------------------------------------------------------------------------------------------------------|-------------------------------------------------------------------------------------------------------------------------------------------------------------------------------|
| GSE29639 | precursor B lymphoblastic lymphoma/leukemia | leukemia                               | 1 |                                                                                                                                           |                                                                                                                                                                               |
| GSE30153 | lupus erythematosus                         | systemic lupus erythematosus           | 1 | Systemic lupus erythematosus (SLE), also known simply as lupus                                                                            | <a href="https://en.wikipedia.org/wiki/Systemic_lupus_erythematosus">https://en.wikipedia.org/wiki/Systemic_lupus_erythematosus</a>                                           |
| GSE3167  | Urothelial carcinoma in situ                | transitional cell carcinoma            | 1 | In this study, we used microarray expression profiling to examine the gene expression patterns in superficial transitional cell carcinoma | <a href="https://www.ncbi.nlm.nih.gov/geo/query/acc.cgi?acc=GSE3167">https://www.ncbi.nlm.nih.gov/geo/query/acc.cgi?acc=GSE3167</a>                                           |
| GSE32323 | colorectal cancer                           | colorectal cancer                      | 1 |                                                                                                                                           |                                                                                                                                                                               |
| GSE32924 | atopic dermatitis                           | atopic dermatitis                      | 1 |                                                                                                                                           |                                                                                                                                                                               |
| GSE3325  | prostate cancer                             | prostate cancer                        | 1 |                                                                                                                                           |                                                                                                                                                                               |
| GSE34299 | colon cancer                                | melanoma                               |   |                                                                                                                                           |                                                                                                                                                                               |
| GSE34308 | adrenoleukodystrophy                        | teratoma                               |   |                                                                                                                                           |                                                                                                                                                                               |
| GSE34526 | polycystic ovary syndrome                   | polycystic ovary syndrome              | 1 |                                                                                                                                           |                                                                                                                                                                               |
| GSE36398 | facioscapulohumeral muscular dystrophy      | facioscapulohumeral muscular dystrophy | 1 |                                                                                                                                           |                                                                                                                                                                               |
| GSE36474 | multiple myeloma                            | multiple myeloma                       | 1 |                                                                                                                                           |                                                                                                                                                                               |
| GSE36700 | systemic lupus erythematosus                | synovitis                              | 1 | Gene expression profiles in synovial biopsies from patients with arthritis                                                                | <a href="https://www.ncbi.nlm.nih.gov/geo/query/acc.cgi?acc=GSE36700">https://www.ncbi.nlm.nih.gov/geo/query/acc.cgi?acc=GSE36700</a>                                         |
| GSE36980 | Alzheimer's disease                         | vascular dementia                      | 1 | Three-way ANOVA of microarray data from frontal cortex, temporal cortex and hippocampus with presence/absence of AD and vascular dementia | <a href="https://www.ncbi.nlm.nih.gov/geo/query/acc.cgi?acc=GSE36980">https://www.ncbi.nlm.nih.gov/geo/query/acc.cgi?acc=GSE36980</a>                                         |
| GSE3744  | breast cancer                               | cancer                                 |   |                                                                                                                                           |                                                                                                                                                                               |
| GSE38010 | multiple sclerosis                          | multiple sclerosis                     | 1 |                                                                                                                                           |                                                                                                                                                                               |
| GSE38680 | Pompe disease, infantile-onset form         | glycogen storage disease II            | 1 | Glycogen storage disease type 2, also known as Pompe disease                                                                              | <a href="https://rarediseases.info.nih.gov/diseases/5714/glycogen-storage-disease-type-2">https://rarediseases.info.nih.gov/diseases/5714/glycogen-storage-disease-type-2</a> |
| GSE39452 | prostate cancer                             | prostate cancer                        | 1 |                                                                                                                                           |                                                                                                                                                                               |
| GSE39621 | Niemann-Pick disease                        | gaucher's disease                      | 1 | Niemann-Pick disease type A or Gaucher disease                                                                                            | <a href="https://rarediseases.org/rare-diseases/niemann-pick-disease-type-c/">https://rarediseases.org/rare-diseases/niemann-pick-disease-type-c/</a>                         |
| GSE4036  | Schizophrenia                               | fetal alcohol syndrome                 | 1 | Studying the basis of learning disabilities and of diseases that show deficits in PPI such as fetal alcohol syndrome and schizophrenia    | <a href="https://www.ncbi.nlm.nih.gov/geo/query/acc.cgi?acc=GSE4036">https://www.ncbi.nlm.nih.gov/geo/query/acc.cgi?acc=GSE4036</a>                                           |

|          |                                  |                                |   |                                                                                                                                      |                                                                                                                                                 |
|----------|----------------------------------|--------------------------------|---|--------------------------------------------------------------------------------------------------------------------------------------|-------------------------------------------------------------------------------------------------------------------------------------------------|
| GSE4107  | colon cancer                     | familial adenomatous polyposis | 1 | Familial adenomatous polyposis (FAP) is an inherited disorder characterized by cancer of the large intestine (colon) and rectum      | <a href="https://ghr.nlm.nih.gov/condition/familial-adenomatous-polyposis">https://ghr.nlm.nih.gov/condition/familial-adenomatous-polyposis</a> |
| GSE4183  | colon adenoma                    | ulcerative colitis             | 1 | Functional classification of precancerous adenoma, different stage colorectal carcinomas (CRC) and inflammatory bowel diseases (IBD) | <a href="https://www.ncbi.nlm.nih.gov/geo/query/acc.cgi?acc=GSE4183">https://www.ncbi.nlm.nih.gov/geo/query/acc.cgi?acc=GSE4183</a>             |
| GSE4250  | Hereditary gingival fibromatosis | gingival fibromatosis          | 1 |                                                                                                                                      |                                                                                                                                                 |
| GSE4290  | oligodendroglioma                | neuroectodermal tumor          | 1 | Both are types of glioma brain tumour                                                                                                | <a href="http://www.cancerresearchuk.org/about-cancer/brain-tumours/types">http://www.cancerresearchuk.org/about-cancer/brain-tumours/types</a> |
| GSE4302  | asthma                           | asthma                         | 1 |                                                                                                                                      |                                                                                                                                                 |
| GSE43292 | atherosclerosis                  | atherosclerosis                | 1 |                                                                                                                                      |                                                                                                                                                 |
| GSE44723 | idiopathic pulmonary fibrosis    | idiopathic pulmonary fibrosis  | 1 |                                                                                                                                      |                                                                                                                                                 |
| GSE47552 | multiple myeloma                 | multiple myeloma               | 1 |                                                                                                                                      |                                                                                                                                                 |
| GSE4757  | Alzheimer's disease              | alzheimer's disease            | 1 |                                                                                                                                      |                                                                                                                                                 |
| GSE48060 | acute myocardial infarction      | myocardial infarction          | 1 |                                                                                                                                      |                                                                                                                                                 |
| GSE49036 | Lewy body dementia               | parkinson's disease            | 1 | Subjects with incidental Lewy body disease (iLBD) may represent the premotor stage of Parkinson's disease (PD)                       | <a href="https://www.ncbi.nlm.nih.gov/geo/query/acc.cgi?acc=GSE49036">https://www.ncbi.nlm.nih.gov/geo/query/acc.cgi?acc=GSE49036</a>           |
| GSE49515 | stomach cancer                   | hepatocellular carcinoma       | 1 | pancreatic carcinoma, gastric carcinoma and hepatocellular carcinoma (HCC) were identified using Affymetrix gene arrays              | <a href="https://www.ncbi.nlm.nih.gov/geo/query/acc.cgi?acc=GSE49515">https://www.ncbi.nlm.nih.gov/geo/query/acc.cgi?acc=GSE49515</a>           |
| GSE5109  | obesity                          | obesity                        | 1 |                                                                                                                                      |                                                                                                                                                 |
| GSE5388  | bipolar disorder                 | bipolar disorder               | 1 |                                                                                                                                      |                                                                                                                                                 |
| GSE5392  | bipolar disorder                 | bipolar disorder               | 1 |                                                                                                                                      |                                                                                                                                                 |
| GSE54958 | papillary thyroid carcinoma      | papillary adenoma              |   |                                                                                                                                      |                                                                                                                                                 |
| GSE54992 | tuberculosis                     | tuberculosis                   | 1 |                                                                                                                                      |                                                                                                                                                 |
| GSE5563  | Vulvar intraepithelial tumor     | cancer                         |   |                                                                                                                                      |                                                                                                                                                 |
| GSE5764  | invasive ductal carcinoma        | breast cancer                  | 1 | We examined ten mastectomy specimens from postmenopausal breast cancer patients                                                      | <a href="https://www.ncbi.nlm.nih.gov/geo/query/acc.cgi?acc=GSE5764">https://www.ncbi.nlm.nih.gov/geo/query/acc.cgi?acc=GSE5764</a>             |
| GSE58208 | hepatocellular carcinoma         | spindle cell carcinoma         |   |                                                                                                                                      |                                                                                                                                                 |
| GSE58435 | Turner syndrome                  | turner syndrome                | 1 |                                                                                                                                      |                                                                                                                                                 |

|          |                                                 |                                    |   |                                                                                                                                                                                |                                                                                                                                                                                                                                                                                               |
|----------|-------------------------------------------------|------------------------------------|---|--------------------------------------------------------------------------------------------------------------------------------------------------------------------------------|-----------------------------------------------------------------------------------------------------------------------------------------------------------------------------------------------------------------------------------------------------------------------------------------------|
| GSE6054  | familial hypercholesterolemia                   | familial hypercholesterolemia      | 1 |                                                                                                                                                                                |                                                                                                                                                                                                                                                                                               |
| GSE6088  | familial hypercholesterolemia                   | familial hypercholesterolemia      | 1 |                                                                                                                                                                                |                                                                                                                                                                                                                                                                                               |
| GSE6281  | allergic contact dermatitis                     | allergic contact dermatitis        | 1 |                                                                                                                                                                                |                                                                                                                                                                                                                                                                                               |
| GSE6364  | endometriosis                                   | infertility                        |   |                                                                                                                                                                                |                                                                                                                                                                                                                                                                                               |
| GSE63941 | esophagus squamous cell carcinoma               | cancer                             |   |                                                                                                                                                                                |                                                                                                                                                                                                                                                                                               |
| GSE65144 | anaplastic thyroid carcinoma                    | spindle cell carcinoma             |   |                                                                                                                                                                                |                                                                                                                                                                                                                                                                                               |
| GSE6575  | autistic disorder                               | autism spectrum disorder           | 1 |                                                                                                                                                                                |                                                                                                                                                                                                                                                                                               |
| GSE6613  | Parkinson's disease                             | Brown's tendon sheath              |   |                                                                                                                                                                                |                                                                                                                                                                                                                                                                                               |
| GSE6691  | chronic lymphocytic leukemia                    | macroglobulinemia                  | 1 | Gene expression profiling of B lymphocytes and plasma cells from Waldenström's macroglobulinemia                                                                               | <a href="https://www.ncbi.nlm.nih.gov/geo/query/acc.cgi?acc=GSE6691">https://www.ncbi.nlm.nih.gov/geo/query/acc.cgi?acc=GSE6691</a>                                                                                                                                                           |
| GSE6740  | Human immunodeficiency virus infectious disease | acquired immunodeficiency syndrome | 1 | data from frontal cortex, temporal cortex and hippocampus with presence/absence of AD and vascular dementia                                                                    | <a href="http://www.stanfordchildrens.org/en/topic/default?id=acquired-immune-deficiency-syndrome-aidshuman-immunodeficiency-virus-hiv-90-P02427">http://www.stanfordchildrens.org/en/topic/default?id=acquired-immune-deficiency-syndrome-aidshuman-immunodeficiency-virus-hiv-90-P02427</a> |
| GSE6764  | hepatocellular carcinoma                        | cancer                             |   |                                                                                                                                                                                |                                                                                                                                                                                                                                                                                               |
| GSE6798  | polycystic ovary syndrome                       | polycystic ovary syndrome          | 1 |                                                                                                                                                                                |                                                                                                                                                                                                                                                                                               |
| GSE6872  | Teratospermia                                   | infertility                        | 1 | We report here the spermatozoal transcript profiles characteristic of normally fertile individuals and infertile males suffering from a consistent and severe teratozoospermia | <a href="https://www.ncbi.nlm.nih.gov/geo/query/acc.cgi?acc=GSE6872">https://www.ncbi.nlm.nih.gov/geo/query/acc.cgi?acc=GSE6872</a>                                                                                                                                                           |
| GSE7305  | endometriosis                                   | infertility                        |   |                                                                                                                                                                                |                                                                                                                                                                                                                                                                                               |
| GSE7486  | epilepsy syndrome                               | epilepsy                           | 1 |                                                                                                                                                                                |                                                                                                                                                                                                                                                                                               |
| GSE7621  | Parkinson's disease                             | alcohol dependence                 |   |                                                                                                                                                                                |                                                                                                                                                                                                                                                                                               |
| GSE7753  | JRA - Juvenile rheumatoid arthritis             | arthropathy                        | 1 | Juvenile idiopathic arthritis, is the most common type of arthritis in children                                                                                                | <a href="https://www.mayoclinic.org/diseases-conditions/juvenile-rheumatoid-arthritis/basics/definition/con-20014378">https://www.mayoclinic.org/diseases-conditions/juvenile-rheumatoid-arthritis/basics/definition/con-20014378</a>                                                         |
| GSE8157  | polycystic ovary syndrome                       | polycystic ovary syndrome          | 1 |                                                                                                                                                                                |                                                                                                                                                                                                                                                                                               |
| GSE8586  | bronchopulmonary dysplasia                      | lung disease                       | 1 | Bronchopulmonary dysplasia is a chronic lung disease                                                                                                                           | <a href="https://en.wikipedia.org/wiki/Bronchopulmonary_dysplasia">https://en.wikipedia.org/wiki/Bronchopulmonary_dysplasia</a>                                                                                                                                                               |
| GSE8762  | Huntington's disease                            | huntington's disease               | 1 |                                                                                                                                                                                |                                                                                                                                                                                                                                                                                               |

|          |                                       |                                                 |   |                                                                                                                           |                                                                                                                                                               |
|----------|---------------------------------------|-------------------------------------------------|---|---------------------------------------------------------------------------------------------------------------------------|---------------------------------------------------------------------------------------------------------------------------------------------------------------|
| GSE8835  | chronic lymphocytic leukemia          | chronic lymphocytic leukemia                    | 1 |                                                                                                                           |                                                                                                                                                               |
| GSE9452  | ulcerative colitis                    | ulcerative colitis                              | 1 |                                                                                                                           |                                                                                                                                                               |
| GSE9476  | acute myeloid leukemia                | acute myeloid leukemia                          | 1 |                                                                                                                           |                                                                                                                                                               |
| GSE9692  | Septic Shock                          | toxic shock syndrome                            | 1 | TSS is a special form of septic shock caused by the toxins of the <i>Staphylococcus</i> and <i>Streptococcus</i> bacteria | <a href="http://www.medbroadcast.com/condition/getcondition/toxic-shock-syndrome">http://www.medbroadcast.com/condition/getcondition/toxic-shock-syndrome</a> |
| GSE9750  | cervical cancer                       | cervical cancer                                 | 1 |                                                                                                                           |                                                                                                                                                               |
| GSE9877  | sickle cell anemia                    | anemia                                          | 1 |                                                                                                                           |                                                                                                                                                               |
| GSE10162 | Nephrolithiasis                       | dent disease                                    | 1 | The fingerprint of these gene changes may help us to understand the phenotype of Dent disease                             | <a href="https://www.ncbi.nlm.nih.gov/geo/query/acc.cgi?acc=GSE10162">https://www.ncbi.nlm.nih.gov/geo/query/acc.cgi?acc=GSE10162</a>                         |
| GSE10167 | Treacher Collins syndrome             | treacher collins syndrome                       | 1 |                                                                                                                           |                                                                                                                                                               |
| GSE11343 | diabetic neuropathy                   | diabetic                                        | 1 |                                                                                                                           |                                                                                                                                                               |
| GSE11494 | Streptococcal tonsillitis             | tonsillitis;tonsillitis                         | 1 |                                                                                                                           |                                                                                                                                                               |
| GSE11686 | cerebral palsy                        | duchenne muscular dystrophy                     |   |                                                                                                                           |                                                                                                                                                               |
| GSE11686 | cerebral palsy                        | duchenne muscular dystrophy                     |   |                                                                                                                           |                                                                                                                                                               |
| GSE11971 | childhood type dermatomyositis        | adult dermatomyositis;childhood type            | 1 |                                                                                                                           |                                                                                                                                                               |
| GSE13083 | Barrett's esophagus                   | barrett's esophagus;barrett's esophagus         | 1 |                                                                                                                           |                                                                                                                                                               |
| GSE13597 | nasopharynx carcinoma                 | ataxia telangiectasia                           |   |                                                                                                                           |                                                                                                                                                               |
| GSE1420  | esophagus adenocarcinoma              | barrett's esophagus                             | 1 | Barrett's esophagus, Barrett's-associated adenocarcinomas and normal esophageal epithelium                                | <a href="https://www.ncbi.nlm.nih.gov/geo/query/acc.cgi?acc=GSE1420">https://www.ncbi.nlm.nih.gov/geo/query/acc.cgi?acc=GSE1420</a>                           |
| GSE14277 | lung cancer                           | lung cancer;adenocarcinoma                      | 1 |                                                                                                                           |                                                                                                                                                               |
| GSE1462  | MELAS syndrome                        | mitochondrial encephalomyopathy;ophthalmoplegia | 1 | Extremely variable clinic and genetic features characterize Mitochondrial Encephalomyopathy Disorders                     | <a href="https://www.ncbi.nlm.nih.gov/geo/query/acc.cgi?acc=GSE1462">https://www.ncbi.nlm.nih.gov/geo/query/acc.cgi?acc=GSE1462</a>                           |
| GSE15568 | cystic fibrosis                       | cystic fibrosis                                 | 1 |                                                                                                                           |                                                                                                                                                               |
| GSE1650  | chronic obstructive pulmonary disease | chronic obstructive pulmonary disease           | 1 |                                                                                                                           |                                                                                                                                                               |
| GSE1786  | Senescence                            | chronic obstructive pulmonary                   |   |                                                                                                                           |                                                                                                                                                               |
| GSE18064 | Rift Valley fever                     | rift valley                                     | 1 |                                                                                                                           |                                                                                                                                                               |
| GSE18965 | asthma                                | asthma                                          | 1 |                                                                                                                           |                                                                                                                                                               |
| GSE19286 | atherosclerosis                       | atherosclerosis                                 | 1 |                                                                                                                           |                                                                                                                                                               |
| GSE19780 | Huntington's disease                  | huntington's disease                            | 1 |                                                                                                                           |                                                                                                                                                               |
| GSE20602 | nephrosclerosis                       | nephrosclerosis                                 | 1 |                                                                                                                           |                                                                                                                                                               |

|          |                                  |                                                                       |   |                                                                                                                                                                  |                                                                                                                                       |
|----------|----------------------------------|-----------------------------------------------------------------------|---|------------------------------------------------------------------------------------------------------------------------------------------------------------------|---------------------------------------------------------------------------------------------------------------------------------------|
| GSE20844 | glomerulosclerosis               | glomerulosclerosis                                                    | 1 |                                                                                                                                                                  |                                                                                                                                       |
| GSE23832 | multiple sclerosis               | multiple sclerosis                                                    | 1 |                                                                                                                                                                  |                                                                                                                                       |
| GSE24250 | Huntington's disease             | neurodegenerative disease                                             |   |                                                                                                                                                                  |                                                                                                                                       |
| GSE25673 | schizophrenia                    | schizophrenia                                                         | 1 |                                                                                                                                                                  |                                                                                                                                       |
| GSE26001 | Huntington's disease             | huntington's disease                                                  | 1 |                                                                                                                                                                  |                                                                                                                                       |
| GSE27131 | swine influenza                  | influenza                                                             | 1 |                                                                                                                                                                  |                                                                                                                                       |
| GSE27628 | psoriasis                        | psoriasis                                                             | 1 |                                                                                                                                                                  |                                                                                                                                       |
| GSE28315 | epidermolysis bullosa simplex    | epidermolysis bullosa simplex                                         | 1 |                                                                                                                                                                  |                                                                                                                                       |
| GSE3100  | cystic fibrosis                  | cystic fibrosis                                                       | 1 |                                                                                                                                                                  |                                                                                                                                       |
| GSE31106 | colorectal adenocarcinoma        | colorectal cancer                                                     | 1 |                                                                                                                                                                  |                                                                                                                                       |
| GSE34619 | Barrett's esophagus              | adenocarcinoma                                                        |   |                                                                                                                                                                  |                                                                                                                                       |
| GSE34925 | breast cancer                    | breast cancer                                                         | 1 |                                                                                                                                                                  |                                                                                                                                       |
| GSE3524  | Squamous cell carcinoma of mouth | oral squamous cell carcinoma                                          | 1 |                                                                                                                                                                  |                                                                                                                                       |
| GSE3554  | glaucoma                         | glaucoma                                                              | 1 |                                                                                                                                                                  |                                                                                                                                       |
| GSE35561 | Down syndrome                    | microcephaly with or without chorioretinopathy, lymphedema, or mental |   |                                                                                                                                                                  |                                                                                                                                       |
| GSE3583  | Huntington's disease             | huntington's disease                                                  | 1 |                                                                                                                                                                  |                                                                                                                                       |
| GSE3585  | dilated cardiomyopathy           | dilated cardiomyopathy                                                | 1 |                                                                                                                                                                  |                                                                                                                                       |
| GSE3889  | Hypercholesteremia               | cholestasis                                                           |   |                                                                                                                                                                  |                                                                                                                                       |
| GSE41649 | allergic asthma                  | allergic asthma                                                       | 1 |                                                                                                                                                                  |                                                                                                                                       |
| GSE42589 | cleft lip                        | cancer                                                                | 1 | Previous findings have appointed an aetiological overlap between NSCL/P and cancer, and alterations in similar biological pathways may underpin both conditions. | <a href="https://www.ncbi.nlm.nih.gov/geo/query/acc.cgi?acc=GSE42589">https://www.ncbi.nlm.nih.gov/geo/query/acc.cgi?acc=GSE42589</a> |
| GSE44025 | leukemia                         | leukemia                                                              | 1 |                                                                                                                                                                  |                                                                                                                                       |
| GSE4646  | Meningococcal infection          | meningitis                                                            | 1 | Signaling of Neisseria meningitidis MC58 mutants to primary human umbilical vein endothelial cells (HUVEC)                                                       |                                                                                                                                       |
| GSE474   | obesity                          | obesity                                                               | 1 |                                                                                                                                                                  |                                                                                                                                       |

|          |                                   |                                                                       |   |                                                                                                                                                                                                               |                                                                                                                                       |
|----------|-----------------------------------|-----------------------------------------------------------------------|---|---------------------------------------------------------------------------------------------------------------------------------------------------------------------------------------------------------------|---------------------------------------------------------------------------------------------------------------------------------------|
| GSE48280 | dermatomyositis                   | inclusion body myositis                                               | 1 | RNA from MHC-I-positive myofibers were obtained from muscle biopsies of 5 patients with dermatomyositis, 5 with polymyositis, 4 with inclusion body myositis and normal looking fibers from healthy controls. | <a href="https://www.ncbi.nlm.nih.gov/geo/query/acc.cgi?acc=GSE48280">https://www.ncbi.nlm.nih.gov/geo/query/acc.cgi?acc=GSE48280</a> |
| GSE48301 | polycystic ovary syndrome         | polycystic ovary syndrome                                             | 1 |                                                                                                                                                                                                               |                                                                                                                                       |
| GSE48964 | morbid obesity                    | atherosclerosis                                                       | 1 | The adipose tissue is an endocrine regulator and a risk factor for atherosclerosis                                                                                                                            | <a href="https://www.ncbi.nlm.nih.gov/geo/query/acc.cgi?acc=GSE48964">https://www.ncbi.nlm.nih.gov/geo/query/acc.cgi?acc=GSE48964</a> |
| GSE5090  | polycystic ovary syndrome         | polycystic ovary syndrome                                             | 1 |                                                                                                                                                                                                               |                                                                                                                                       |
| GSE5389  | bipolar disorder                  | bipolar disorder                                                      | 1 |                                                                                                                                                                                                               |                                                                                                                                       |
| GSE5390  | Down syndrome                     | microcephaly with or without chorioretinopathy, lymphedema, or mental |   |                                                                                                                                                                                                               |                                                                                                                                       |
| GSE57178 | urticaria                         | urticaria                                                             | 1 |                                                                                                                                                                                                               |                                                                                                                                       |
| GSE5788  | Leukemia, Chronic T-Cell          | lymphoma                                                              | 1 | T-cell prolymphocytic leukemia (T-PLL) is an aggressive lymphoma derived from mature T-cells                                                                                                                  | <a href="https://www.ncbi.nlm.nih.gov/geo/query/acc.cgi?acc=GSE5788">https://www.ncbi.nlm.nih.gov/geo/query/acc.cgi?acc=GSE5788</a>   |
| GSE6011  | Duchenne muscular dystrophy       | duchenne muscular dystrophy                                           | 1 |                                                                                                                                                                                                               |                                                                                                                                       |
| GSE60502 | hepatocellular carcinoma          | hepatocellular carcinoma                                              | 1 |                                                                                                                                                                                                               |                                                                                                                                       |
| GSE62632 | autism spectrum disorder          | rett syndrome                                                         |   |                                                                                                                                                                                                               |                                                                                                                                       |
| GSE6399  | Emery-Dreifuss muscular dystrophy | emery-dreifuss muscular dystrophy                                     | 1 |                                                                                                                                                                                                               |                                                                                                                                       |
| GSE6461  | synovial sarcoma                  | synovial sarcoma                                                      | 1 |                                                                                                                                                                                                               |                                                                                                                                       |
| GSE64756 | in situ carcinoma                 | carcinoma                                                             | 1 |                                                                                                                                                                                                               |                                                                                                                                       |
| GSE6710  | Psoriasis vulgaris                | psoriasis                                                             | 1 |                                                                                                                                                                                                               |                                                                                                                                       |
| GSE6980  | multiple myeloma                  | multiple myeloma                                                      | 1 |                                                                                                                                                                                                               |                                                                                                                                       |
| GSE8000  | Emery-Dreifuss muscular dystrophy | cardiomyopathy                                                        | 1 | Activation of MAPK pathways links LMNA mutations to cardiomyopathy in Emery-Dreifuss muscular dystrophy                                                                                                       | <a href="https://www.ncbi.nlm.nih.gov/geo/query/acc.cgi?acc=GSE8000">https://www.ncbi.nlm.nih.gov/geo/query/acc.cgi?acc=GSE8000</a>   |
| GSE9574  | breast cancer                     | breast cancer                                                         | 1 |                                                                                                                                                                                                               |                                                                                                                                       |

Total matches  
%percentage

139  
82%
