# Supplementary material for: BioDataome: a collection of uniformly preprocessed and automatically annotated datasets for data-driven biology
Source: Oxford University Press journal article supplement (doi:10.1093/database/bay011), 2018-01-01
Supplement: bay011_supp_table2.pdf [file bay011_supp_table2.pdf]

Table 2: All mismatches of CREEDS and BioDataome comparison. In 18 out of 30 mismatches BioDataome assigns a relative, however more general disease term.

| GSE      | creeds                                     | biodataome                                                                        |
|----------|--------------------------------------------|-----------------------------------------------------------------------------------|
| GSE10631 | LGLL - Large granular lymphocytic leukemia | leukemia                                                                          |
| GSE12452 | nasopharynx carcinoma                      | spindle cell carcinoma                                                            |
| GSE16461 | relapsing-remitting multiple sclerosis     | rheumatoid arthritis                                                              |
| GSE20948 | hepatitis C                                | spindle cell carcinoma                                                            |
| GSE24514 | colorectal adenocarcinoma                  | spindle cell carcinoma                                                            |
| GSE26910 | breast cancer                              | cancer                                                                            |
| GSE26969 | intracranial aneurysm                      | Bowman's membrane folds or rupture                                                |
| GSE34299 | colon cancer                               | melanoma                                                                          |
| GSE34308 | adrenoleukodystrophy                       | teratoma                                                                          |
| GSE3744  | breast cancer                              | cancer                                                                            |
| GSE54958 | papillary thyroid carcinoma                | papillary adenoma                                                                 |
| GSE5563  | Vulvar intraepithelial tumor               | cancer                                                                            |
| GSE58208 | hepatocellular carcinoma                   | spindle cell carcinoma                                                            |
| GSE6364  | endometriosis                              | infertility                                                                       |
| GSE63941 | esophagus squamous cell carcinoma          | cancer                                                                            |
| GSE65144 | anaplastic thyroid carcinoma               | spindle cell carcinoma                                                            |
| GSE6613  | Parkinson's disease                        | Brown's tendon sheath syndrome                                                    |
| GSE6764  | hepatocellular carcinoma                   | cancer                                                                            |
| GSE7305  | endometriosis                              | infertility                                                                       |
| GSE7621  | Parkinson's disease                        | alcohol dependence                                                                |
| GSE11686 | cerebral palsy                             | duchenne muscular dystrophy                                                       |
| GSE11686 | cerebral palsy                             | duchenne muscular dystrophy                                                       |
| GSE13597 | nasopharynx carcinoma                      | ataxia telangiectasia                                                             |
| GSE1786  | Senescence                                 | chronic obstructive pulmonary disease                                             |
| GSE24250 | Huntington's disease                       | neurodegenerative disease                                                         |
| GSE34619 | Barrett's esophagus                        | adenocarcinoma                                                                    |
| GSE35561 | Down syndrome                              | microcephaly with or without chorioretinopathy, lymphedema, or mental retardation |
| GSE3889  | Hypercholesteremia                         | cholestasis                                                                       |
| GSE5390  | Down syndrome                              | microcephaly with or without chorioretinopathy, lymphedema, or mental retardation |
| GSE62632 | autism spectrum disorder                   | rett syndrome                                                                     |
